# Supplementary material
Source: Springer Nature journal article supplement (https://www.springermedizin.de/resource/supplementary/12986_2004_19_MOESM2_ESM.pdf/25655252)

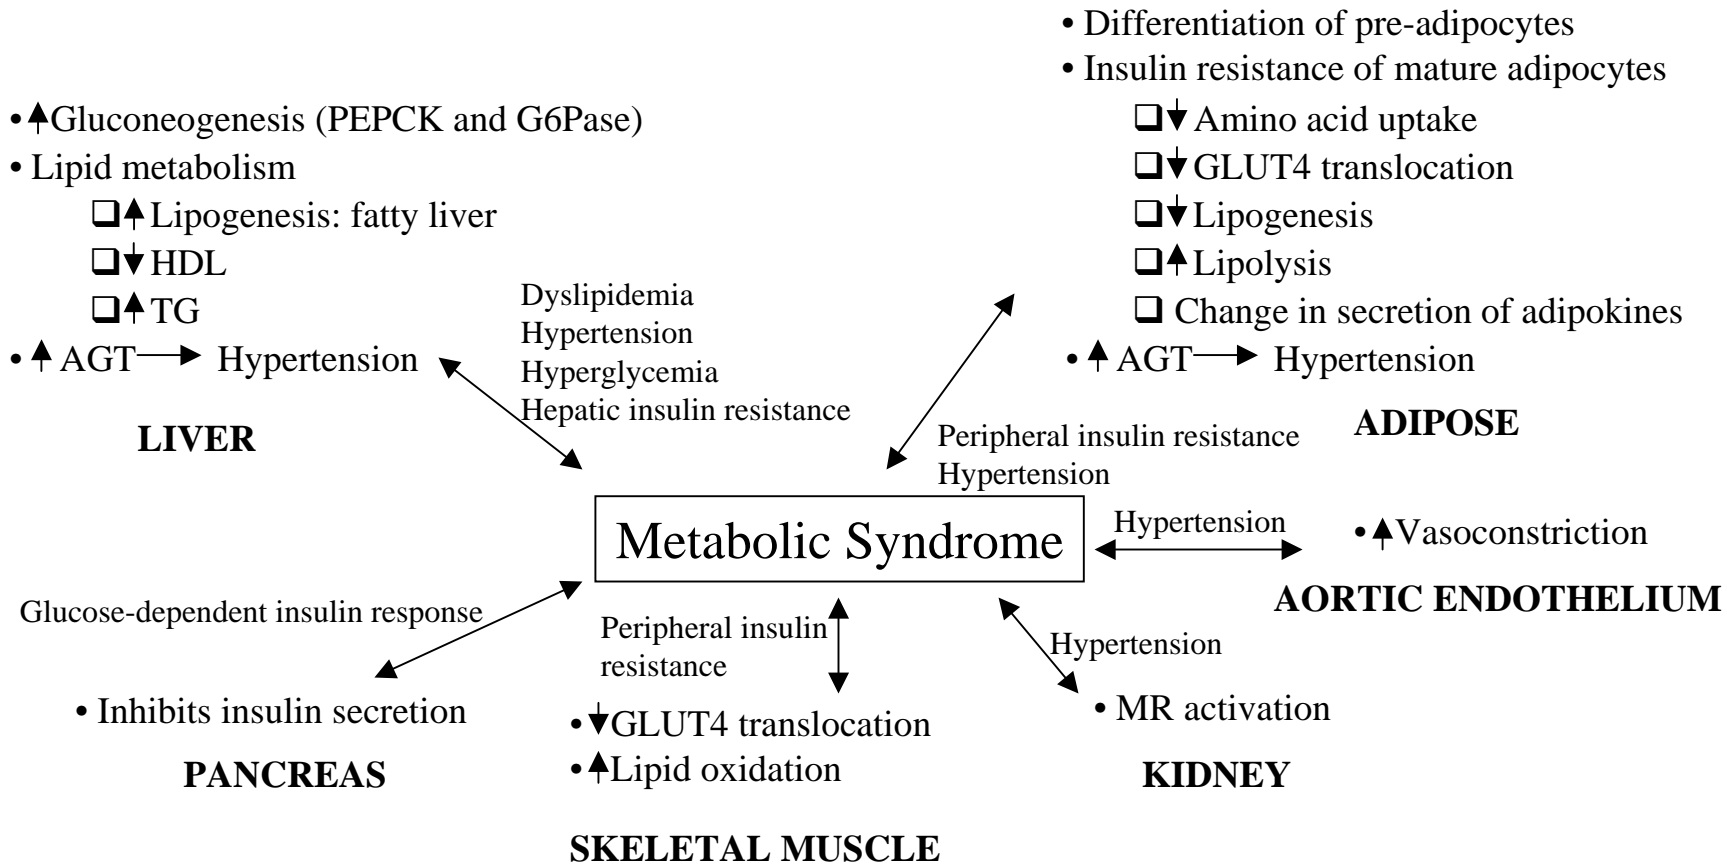

Fig. 2

Supplement: MOESM2 [file 25655252]
